# Supplementary material for: Alkyltin clusters: the less symmetric Keggin isomers
Source: Royal Society of Chemistry journal article supplement (doi:10.1039/c8dt01950a), 2018-01-01
Supplement: c8dt01950a1.pdf [file c8dt01950a1.pdf]

## SUPPORTING INFORMATION

### Alkyltin Clusters: The Less Symmetric Keggin Isomers

Danielle C. Hutchison <sup>[a]</sup>, Rebecca D. Stern <sup>[b]</sup>, Morgan R. Olsen <sup>[a]</sup>, Lev N. Zakharov <sup>[a]</sup>, Kristin A. Persson <sup>[b,c]</sup>, May Nyman <sup>[a]</sup>

<sup>[a]</sup>Department of Chemistry, Oregon State University, 153 Gilbert Hall, Corvallis, Oregon 97331 (USA)

<sup>[b]</sup>Department of Materials Science and Engineering, University of California Berkeley, Berkeley, California 94720 (USA)

<sup>[c]</sup>Lawrence Berkeley National Laboratory, Berkeley, CA 94720 (USA)

#### Table of Contents:

- Bond Valence Sum for Oxo Ligands of Clusters (Tables SI1-3)
- Experimental ESI MS and Calculated Peak Positions for Clusters (Figs. SI1-6)
- Size distribution and modelling of SAXS data (Figs. SI7-8)
- FTIR spectrum of  $\beta,\gamma$ -NaSn<sub>12</sub> (Fig SI10)
- Full authorship of Gaussian 09<sup>1</sup>

#### Tables and Figures:

**Table SI1:** BVS for Oxo Ligands of  $\beta$ -NaSn<sub>12</sub>.

**Table SI2:** BVS for Oxo Ligands of  $\gamma$ -NaSn<sub>12</sub>.

**Table SI3:** BVS for Oxo Ligands of  $\gamma$ -NaSn<sub>13</sub>.

**Fig. SI1:** Experimental ESI MS (+, blue spectrum) and calculated peak positions (red) for [(BuSn)<sub>11</sub>(NaO<sub>4</sub>)(OCH<sub>3</sub>)<sub>12</sub>(OH)<sub>17</sub>]<sup>1+</sup>.

**Fig. SI2:** Experimental ESI MS (+, blue spectrum) and calculated peak positions (red) for [(BuSn)<sub>12</sub>(NaO<sub>4</sub>)(O)<sub>10</sub>(OH)(OCH<sub>3</sub>)<sub>7</sub>]<sup>1+</sup>.

**Fig. SI3:** Experimental ESI MS (+, blue spectrum) and calculated peak positions (red) for [(BuSn)<sub>12</sub>(NaO<sub>4</sub>)(O)<sub>9</sub>(OH)<sub>2</sub>(OCH<sub>3</sub>)<sub>8</sub>]<sup>1+</sup>.

**Fig. SI4:** Experimental ESI MS (+, blue spectrum) and calculated peak positions (red) for [(BuSn)<sub>12</sub>(NaO<sub>4</sub>)(O)<sub>8</sub>(OH)<sub>3</sub>(OCH<sub>3</sub>)<sub>9</sub>]<sup>1+</sup>.

**Fig. SI5:** Experimental ESI MS (+, blue spectrum) and calculated peak positions (red) for [(BuSn)<sub>12</sub>(NaO<sub>4</sub>)(O)<sub>7</sub>(OH)<sub>4</sub>(OCH<sub>3</sub>)<sub>10</sub>]<sup>1+</sup>.

**Fig. SI6:** Experimental ESI MS (+, blue spectrum) and calculated peak positions (red) for [(BuSn)<sub>12</sub>(NaO<sub>4</sub>)(O)<sub>6</sub>(OH)<sub>5</sub>(OCH<sub>3</sub>)<sub>11</sub>]<sup>1+</sup>.

**Fig. SI7:** Experimental ESI MS (+, blue spectrum) and calculated peak positions (red) for  $[(\text{BuSn})_{12}(\text{NaO}_4)(\text{O})_4(\text{OH})_7(\text{OCH}_3)_{13}]^{1+}$ .

**Fig. SI8:** Experimental ESI MS (+, blue spectrum) and calculated peak positions (red) for  $[(\text{BuSn})_{12}(\text{NaO}_4)(\text{O})_5(\text{OH})_6(\text{OCH}_3)_{12}]^{1+}$ .

**Fig. SI9:** Experimental ESI MS (+, blue spectrum) and calculated peak positions (red) for  $[(\text{BuSn})_{12}(\text{NaO}_4)(\text{O})_5(\text{OH})_{13}(\text{OCH}_3)_9(\text{CH}_3\text{OH})_9]^{1+}$ .

**Figure SI10:** Size distribution analysis of SAXS data of  $\gamma\text{-NaSn}_{12}$  in benzene.

**Figure SI11:** Modelling II results for  $\beta,\gamma\text{-NaSn}_{12}$  in benzene. The experimental scattering curve is in red and the calculated model in gray. The calculated radius is consistent with the radius determined from the experimental crystal structure.

**Figure SI12:** FTIR spectrum for  $\beta,\gamma\text{-NaSn}_{12}$

### Bond Valence Sum for Oxo Ligands of Clusters

**Table SI1:** BVS for Oxo Ligands of  $\beta\text{-NaSn}_{12}$ .

| Assignment                     | Atom 1 | Atom 2 | d (Å)     | BV  | BVS  |
|--------------------------------|--------|--------|-----------|-----|------|
| O <sup>2-</sup><br>Central oxo | O1     | Sn1    | 2.090(16) | 0.6 | 2.09 |
|                                | O1     | Sn2    | 2.085(10) | 0.6 |      |
|                                | O1     | Sn2    | 2.085(10) | 0.6 |      |
|                                | O1     | Na1    | 2.314(19) | 0.3 |      |
| O <sup>2-</sup><br>Central oxo | O2     | Sn3    | 2.075(15) | 0.6 | 2.16 |
|                                | O2     | Sn4    | 2.067(9)  | 0.6 |      |
|                                | O2     | Sn4    | 2.067(9)  | 0.6 |      |
|                                | O2     | Na1    | 2.330(16) | 0.2 |      |
| O <sup>2-</sup><br>Central oxo | O3     | Sn5    | 2.094(12) | 0.6 | 2.09 |
|                                | O3     | Sn6    | 2.075(12) | 0.6 |      |
|                                | O3     | Sn7    | 2.082(13) | 0.6 |      |
|                                | O3     | Na1    | 2.326(12) | 0.2 |      |
| OH <sup>-</sup>                | O5     | Sn1    | 2.033(14) | 0.7 | 1.34 |
|                                | O5     | Sn5    | 2.074(15) | 0.6 |      |
| O <sup>2-</sup>                | O7     | Sn2    | 2.031(12) | 0.7 | 1.39 |
|                                | O7     | Sn3    | 2.051(12) | 0.7 |      |
| OH <sup>-</sup>                | O8     | Sn2    | 2.084(14) | 0.6 | 1.24 |
|                                | O8     | Sn6    | 2.079(14) | 0.6 |      |
| O <sup>2-</sup>                | O11    | Sn4    | 2.056(13) | 0.7 | 1.38 |
|                                | O11    | Sn6    | 2.030(12) | 0.7 |      |
| OH/O <sup>2-</sup>             | O12    | Sn4    | 2.067(13) | 0.6 | 1.35 |

|                               |     |     |           |     |      |
|-------------------------------|-----|-----|-----------|-----|------|
|                               | O12 | Sn7 | 2.033(13) | 0.7 |      |
| OH <sup>-</sup>               | O16 | Sn5 | 2.065(7)  | 0.6 | 1.30 |
|                               | O16 | Sn5 | 2.065(7)  | 0.6 |      |
| OH <sup>-</sup>               | O17 | Sn7 | 2.116(7)  | 0.6 | 1.13 |
|                               | O17 | Sn7 | 2.116(7)  | 0.6 |      |
| OCH <sub>3</sub> <sup>-</sup> | O4  | Sn1 | 2.145(15) | 0.5 | 1.87 |
|                               | O4  | Sn2 | 2.161(14) | 0.5 |      |
|                               | O4  | C29 | 1.45(3)   | 0.8 |      |
| OCH <sub>3</sub> <sup>-</sup> | O6  | Sn2 | 2.133(13) | 0.5 | 1.86 |
|                               | O6  | Sn2 | 2.133(13) | 0.5 |      |
|                               | O6  | C30 | 1.48(4)   | 0.8 |      |
| OCH <sub>3</sub> <sup>-</sup> | O9  | Sn4 | 2.162(12) | 0.5 | 1.77 |
|                               | O9  | Sn4 | 2.162(12) | 0.5 |      |
|                               | O9  | C31 | 1.48(4)   | 0.8 |      |
| OCH <sub>3</sub> <sup>-</sup> | O10 | Sn3 | 2.119(13) | 0.6 | 2.21 |
|                               | O10 | Sn4 | 2.178(13) | 0.5 |      |
|                               | O10 | C32 | 1.33(3)   | 1.2 |      |
| OCH <sub>3</sub> <sup>-</sup> | O13 | Sn5 | 2.15116   | 0.5 | 1.87 |
|                               | O13 | Sn2 | 2.15316   | 0.5 |      |
|                               | O13 | C33 | 1.453     | 0.8 |      |
| OCH <sub>3</sub> <sup>-</sup> | O14 | Sn5 | 2.132(17) | 0.5 | 2.05 |
|                               | O14 | Sn7 | 2.147(15) | 0.5 |      |
|                               | O14 | C34 | 1.39(3)   | 1.0 |      |
| OCH <sub>3</sub> <sup>-</sup> | O15 | Sn6 | 2.094(17) | 0.6 | 1.86 |
|                               | O15 | Sn7 | 2.148(17) | 0.5 |      |
|                               | O15 | C35 | 1.50(3)   | 0.7 |      |

**Table S12:** BVS for Oxo Ligands of  $\gamma$ -NaSn<sub>12</sub>.

| Assignment                     | Atom 1 | Atom 2 | d (Å)     | BV  | BVS  |
|--------------------------------|--------|--------|-----------|-----|------|
| O <sup>2-</sup><br>Central oxo | O1     | Sn1    | 2.114(11) | 0.6 | 2.00 |
|                                | O1     | Sn2    | 2.102(11) | 0.6 |      |
|                                | O1     | Sn3    | 2.091(10) | 0.6 |      |
|                                | O1     | Na1    | 2.339(12) | 0.2 |      |
| O <sup>2-</sup><br>Central oxo | O2     | Sn4    | 2.062(11) | 0.7 | 2.07 |
|                                | O2     | Sn5    | 2.079(9)  | 0.6 |      |
|                                | O2     | Sn6    | 2.125(10) | 0.6 |      |
|                                | O2     | Na1    | 2.329(12) | 0.2 |      |
| O <sup>2-</sup><br>Central oxo | O3     | Sn7    | 2.078(9)  | 0.6 | 2.05 |

|                                |     |      |           |     |      |
|--------------------------------|-----|------|-----------|-----|------|
|                                | O3  | Sn8  | 2.074(11) | 0.6 |      |
|                                | O3  | Sn9  | 2.121(10) | 0.6 |      |
|                                | O3  | Na1  | 2.336(12) | 0.2 |      |
| O <sup>2-</sup><br>Central oxo | O4  | Sn10 | 2.082(9)  | 0.6 | 2.03 |
|                                | O4  | Sn11 | 2.081(10) | 0.6 |      |
|                                | O4  | Sn12 | 2.118(10) | 0.6 |      |
|                                | O4  | Na1  | 2.356(11) | 0.2 |      |
| O <sup>2-</sup>                | O17 | Sn2  | 2.035(11) | 0.7 | 1.35 |
|                                | O17 | Sn7  | 2.066(11) | 0.6 |      |
| OH <sup>-</sup>                | O18 | Sn2  | 2.072(12) | 0.6 | 1.21 |
|                                | O18 | Sn8  | 2.1081(1) | 0.6 |      |
| OH <sup>-</sup>                | O19 | Sn3  | 2.074(12) | 0.6 | 1.23 |
|                                | O19 | Sn10 | 2.091(12) | 0.6 |      |
| OH <sup>-</sup>                | O20 | Sn3  | 2.110(11) | 0.6 | 1.13 |
|                                | O20 | Sn10 | 2.123(12) | 0.6 |      |
| OH <sup>-</sup>                | O21 | Sn1  | 2.078(12) | 0.6 | 1.22 |
|                                | O21 | Sn4  | 2.097(11) | 0.6 |      |
| OH <sup>-</sup>                | O22 | Sn4  | 2.065(11) | 0.6 | 1.31 |
|                                | O22 | Sn12 | 2.059(11) | 0.7 |      |
| O <sup>2-</sup>                | O23 | Sn1  | 2.042(10) | 0.7 | 1.38 |
|                                | O23 | Sn5  | 2.043(10) | 0.7 |      |
| OH <sup>-</sup>                | O24 | Sn5  | 2.100(13) | 0.6 | 1.33 |
|                                | O24 | Sn7  | 2.017(13) | 0.7 |      |
| O <sup>2-</sup>                | O25 | Sn6  | 2.040(12) | 0.7 | 1.35 |
|                                | O25 | Sn9  | 2.064(11) | 0.7 |      |
| O <sup>2-</sup>                | O26 | Sn6  | 2.037(9)  | 0.7 | 1.38 |
|                                | O26 | Sn12 | 2.045(10) | 0.7 |      |
| O <sup>2-</sup>                | O27 | Sn9  | 2.039(10) | 0.7 | 1.41 |
|                                | O27 | Sn10 | 2.031(10) | 0.7 |      |
| OH <sup>-</sup>                | O28 | Sn8  | 2.080(11) | 0.6 | 1.22 |
|                                | O28 | Sn11 | 2.094(11) | 0.6 |      |
| OCH <sub>3</sub> <sup>-</sup>  | O5  | Sn1  | 2.143(12) | 0.5 | 1.99 |
|                                | O5  | Sn2  | 2.147(12) | 0.5 |      |
|                                | O5  | C49  | 1.41(2)   | 0.9 |      |
| OCH <sub>3</sub> <sup>-</sup>  | O6  | Sn1  | 2.128(11) | 0.5 | 1.95 |
|                                | O6  | Sn3  | 2.196(12) | 0.5 |      |
|                                | O6  | C50  | 1.41(2)   | 0.9 |      |
| OCH <sub>3</sub> <sup>-</sup>  | O7  | Sn2  | 2.138(11) | 0.5 | 1.92 |
|                                | O7  | Sn3  | 2.149(12) | 0.5 |      |
|                                | O7  | C51  | 1.44(2)   | 0.9 |      |

|                               |     |      |           |     |      |
|-------------------------------|-----|------|-----------|-----|------|
| OCH <sub>3</sub> <sup>-</sup> | O8  | Sn4  | 2.144(11) | 0.5 | 1.86 |
|                               | O8  | Sn5  | 2.184(13) | 0.5 |      |
|                               | O8  | C52  | 1.44(2)   | 0.9 |      |
| OCH <sub>3</sub> <sup>-</sup> | O9  | Sn4  | 2.146(11) | 0.5 | 1.88 |
|                               | O9  | Sn6  | 2.170(13) | 0.5 |      |
|                               | O9  | C53  | 1.44(2)   | 0.9 |      |
| OCH <sub>3</sub> <sup>-</sup> | O10 | Sn5  | 2.173(11) | 0.5 | 1.90 |
|                               | O10 | Sn6  | 2.144(10) | 0.5 |      |
|                               | O10 | C54  | 1.43(2)   | 0.9 |      |
| OCH <sub>3</sub> <sup>-</sup> | O11 | Sn7  | 2.190(13) | 0.5 | 1.88 |
|                               | O11 | Sn8  | 2.114(12) | 0.6 |      |
|                               | O11 | C55  | 1.45(2)   | 0.8 |      |
| OCH <sub>3</sub> <sup>-</sup> | O12 | Sn7  | 2.152(11) | 0.5 | 1.87 |
|                               | O12 | Sn9  | 2.172(11) | 0.5 |      |
|                               | O12 | C56  | 1.44(2)   | 0.9 |      |
| OCH <sub>3</sub> <sup>-</sup> | O13 | Sn8  | 2.150(12) | 0.5 | 1.89 |
|                               | O13 | Sn9  | 2.159(13) | 0.5 |      |
|                               | O13 | C57  | 1.44(2)   | 0.9 |      |
| OCH <sub>3</sub> <sup>-</sup> | O14 | Sn10 | 2.156(11) | 0.5 | 2.10 |
|                               | O14 | Sn11 | 2.153(10) | 0.5 |      |
|                               | O14 | C58  | 1.36(2)   | 1.0 |      |
| OCH <sub>3</sub> <sup>-</sup> | O15 | Sn10 | 2.171(12) | 0.5 | 2.05 |
|                               | O15 | Sn12 | 2.131(10) | 0.5 |      |
|                               | O15 | C59  | 1.38(2)   | 1.0 |      |
| OCH <sub>3</sub> <sup>-</sup> | O16 | Sn11 | 2.149(12) | 0.5 | 2.00 |
|                               | O16 | Sn12 | 2.192(12) | 0.5 |      |
|                               | O16 | C60  | 1.38(2)   | 1.0 |      |

**Table SI3:** BVS for Oxo Ligands of  $\gamma$ -NaSn<sub>13</sub>.

| Assignment                     | Atom 1 | Atom 2 | d (Å)     | BV  | BVS  |
|--------------------------------|--------|--------|-----------|-----|------|
| O <sup>2-</sup><br>Central oxo | O1     | Sn1    | 2.084(13) | 0.6 | 2.00 |
|                                | O1     | Sn2    | 2.138(16) | 0.5 |      |
|                                | O1     | Sn3    | 2.093(17) | 0.6 |      |
|                                | O1     | Na1    | 2.324(16) | 0.2 |      |
| O <sup>2-</sup><br>Central oxo | O2     | Sn4    | 2.05(2)   | 0.7 | 2.09 |
|                                | O2     | Sn5    | 2.111(16) | 0.6 |      |
|                                | O2     | Sn6    | 2.102(15) | 0.6 |      |

|                                |     |      |           |     |      |
|--------------------------------|-----|------|-----------|-----|------|
|                                | O2  | Na1  | 2.31(2)   | 0.2 |      |
| O <sup>2-</sup><br>Central oxo | O3  | Sn7  | 2.110(17) | 0.6 | 2.02 |
|                                | O3  | Sn8  | 2.106(13) | 0.6 |      |
|                                | O3  | Sn9  | 2.086(18) | 0.6 |      |
|                                | O3  | Na1  | 2.320(15) | 0.2 |      |
| O <sup>2-</sup><br>Central oxo | O4  | Sn10 | 2.100(16) | 0.6 | 2.15 |
|                                | O4  | Sn11 | 1.99(3)   | 0.8 |      |
|                                | O4  | Sn12 | 2.108(16) | 0.6 |      |
|                                | O4  | Na1  | 2.40(2)   | 0.2 |      |
| O <sup>2-</sup>                | O17 | Sn1  | 2.102(15) | 0.6 | 2.04 |
|                                | O17 | Sn8  | 2.143(15) | 0.5 |      |
|                                | O17 | Sn13 | 1.931(15) | 0.9 |      |
| OH <sup>-</sup>                | O18 | Sn1  | 2.036(15) | 0.7 | 1.30 |
|                                | O18 | Sn8  | 2.098(16) | 0.6 |      |
| OH <sup>-</sup>                | O19 | Sn2  | 2.095(18) | 0.6 | 1.17 |
|                                | O19 | Sn4  | 2.112(16) | 0.6 |      |
| O <sup>2-</sup>                | O20 | Sn2  | 2.019(16) | 0.7 | 1.48 |
|                                | O20 | Sn6  | 2.015(16) | 0.7 |      |
| O <sup>2-</sup>                | O21 | Sn3  | 2.042(17) | 0.7 | 1.79 |
|                                | O21 | Sn11 | 2.087(15) | 0.6 |      |
|                                | O21 | Sn13 | 2.172(16) | 0.5 |      |
| O <sup>2-</sup>                | O22 | Sn3  | 2.081(16) | 0.6 | 1.31 |
|                                | O22 | Sn12 | 2.045(16) | 0.7 |      |
| OH <sup>-</sup>                | O23 | Sn4  | 2.105(16) | 0.6 | 1.16 |
|                                | O23 | Sn7  | 2.111(19) | 0.6 |      |
| O <sup>2-</sup>                | O24 | Sn5  | 2.024(16) | 0.7 | 1.45 |
|                                | O24 | Sn7  | 2.024(16) | 0.7 |      |
| O <sup>2-</sup>                | O25 | Sn5  | 2.18(3)   | 0.5 | 1.33 |
|                                | O25 | Sn10 | 1.96(3)   | 0.9 |      |
| OH <sup>-</sup>                | O26 | Sn6  | 2.02(3)   | 0.7 | 1.30 |
|                                | O26 | Sn12 | 2.11(3)   | 0.6 |      |
| OH <sup>-</sup>                | O27 | Sn9  | 2.102(17) | 0.6 | 1.27 |
|                                | O27 | Sn10 | 2.044(16) | 0.7 |      |
| O <sup>2-</sup>                | O28 | Sn9  | 2.104(17) | 0.6 | 1.85 |
|                                | O28 | Sn11 | 2.111(15) | 0.6 |      |
|                                | O28 | Sn13 | 2.041(16) | 0.7 |      |
| OH <sup>-</sup>                | O12 | Sn8  | 2.148(18) | 0.5 | 1.07 |
|                                | O12 | Sn9  | 2.124(14) | 0.6 |      |
| OCH <sub>3</sub> <sup>-</sup>  | O5  | Sn1  | 2.191(16) | 0.5 | 1.84 |
|                                | O5  | Sn3  | 2.140(14) | 0.5 |      |

|                                                 |     |      |           |     |      |
|-------------------------------------------------|-----|------|-----------|-----|------|
|                                                 | O5  | C53  | 1.45(3)   | 0.8 |      |
| OCH <sub>3</sub> <sup>-</sup>                   | O6  | Sn1  | 2.113(16) | 0.6 | 2.05 |
|                                                 | O6  | Sn2  | 2.148(14) | 0.5 |      |
|                                                 | O6  | C54  | 1.40(3)   | 1.0 |      |
| OCH <sub>3</sub> <sup>-</sup>                   | O7  | Sn2  | 2.147(18) | 0.5 | 1.80 |
|                                                 | O7  | Sn3  | 2.163(18) | 0.5 |      |
|                                                 | O7  | C55  | 1.48(3)   | 0.8 |      |
| OCH <sub>3</sub> <sup>-</sup>                   | O8  | Sn4  | 2.09(2)   | 0.6 | 1.95 |
|                                                 | O8  | Sn5  | 2.17(3)   | 0.5 |      |
|                                                 | O8  | C56  | 1.44(5)   | 0.9 |      |
| OCH <sub>3</sub> <sup>-</sup>                   | O9  | Sn5  | 2.178(18) | 0.5 | 1.89 |
|                                                 | O9  | Sn6  | 2.149(18) | 0.5 |      |
|                                                 | O9  | C57  | 1.43(3)   | 0.9 |      |
| OCH <sub>3</sub> <sup>-</sup>                   | O10 | Sn4  | 2.094(18) | 0.6 | 1.85 |
|                                                 | O10 | Sn10 | 2.18(3)   | 0.5 |      |
|                                                 | O10 | C58  | 1.48(4)   | 0.8 |      |
| OCH <sub>3</sub> <sup>-</sup>                   | O11 | Sn8  | 2.154(14) | 0.5 | 2.11 |
|                                                 | O11 | Sn9  | 2.117(17) | 0.6 |      |
|                                                 | O11 | C59  | 1.37(6)   | 1.0 |      |
| OCH <sub>3</sub> <sup>-</sup>                   | O13 | Sn7  | 2.131(19) | 0.5 | 1.87 |
|                                                 | O13 | Sn9  | 2.190(18) | 0.5 |      |
|                                                 | O13 | C61  | 1.44(3)   | 0.9 |      |
| OCH <sub>3</sub> <sup>-</sup>                   | O14 | Sn10 | 2.25(3)   | 0.4 | 1.95 |
|                                                 | O14 | Sn11 | 2.053(18) | 0.7 |      |
|                                                 | O14 | C62  | 1.43(4)   | 0.9 |      |
| OCH <sub>3</sub> <sup>-</sup>                   | O15 | Sn10 | 2.163(18) | 0.5 | 1.84 |
|                                                 | O15 | Sn12 | 2.163(18) | 0.5 |      |
|                                                 | O15 | C63  | 1.45(4)   | 0.8 |      |
| OCH <sub>3</sub> <sup>-</sup>                   | O16 | Sn11 | 2.090(18) | 0.6 | 1.88 |
|                                                 | O16 | Sn12 | 2.21(3)   | 0.4 |      |
|                                                 | O16 | C64  | 1.45(5)   | 0.8 |      |
| OCH <sub>3</sub> <sup>-</sup><br>On capping tin | O29 | Sn13 | 2.063(18) | 0.7 | 1.73 |
|                                                 | O29 | C65  | 1.36(4)   | 1.1 |      |

## Complete ESI-MS Peak Assignments

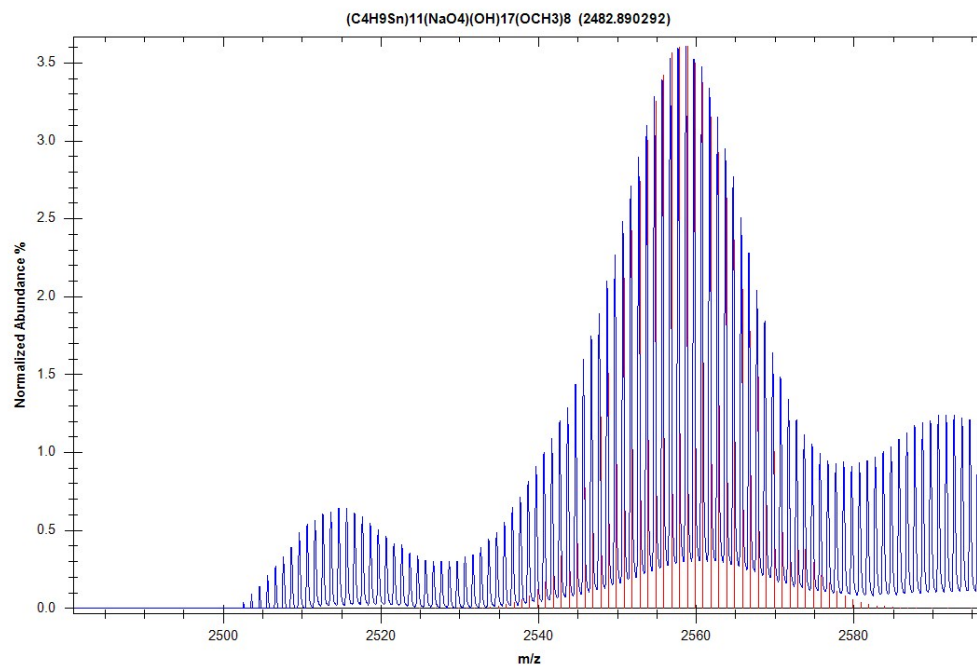

**Fig. S11:** Experimental ESI MS (+, blue spectrum) and calculated peak positions (red) for  $[(\text{BuSn})_{11}(\text{NaO}_4)(\text{OH})_{17}(\text{OCH}_3)_{12}]^{1+}$ .

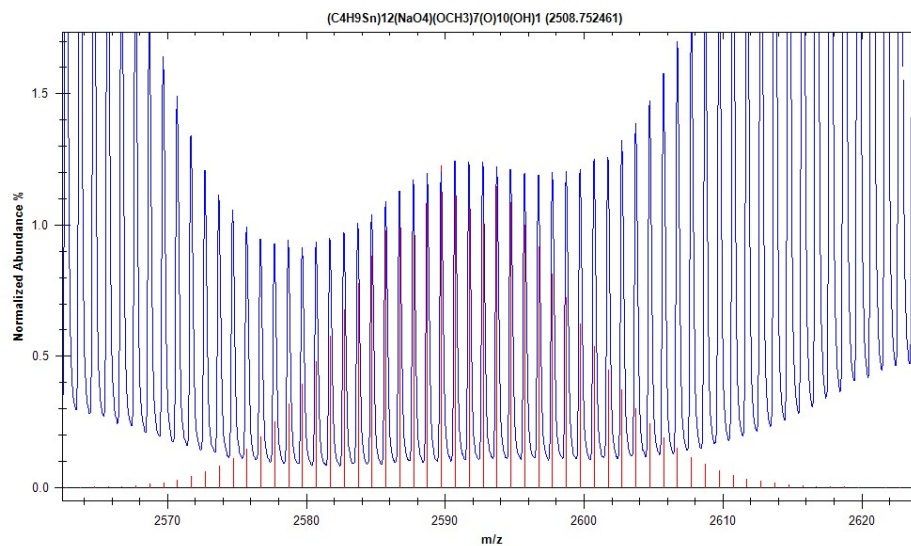

**Fig. S12:** Experimental ESI MS (+, blue spectrum) and calculated peak positions (red) for  $[(\text{BuSn})_{12}(\text{NaO}_4)(\text{O})_{10}(\text{OH})(\text{OCH}_3)_7]^{1+}$ .



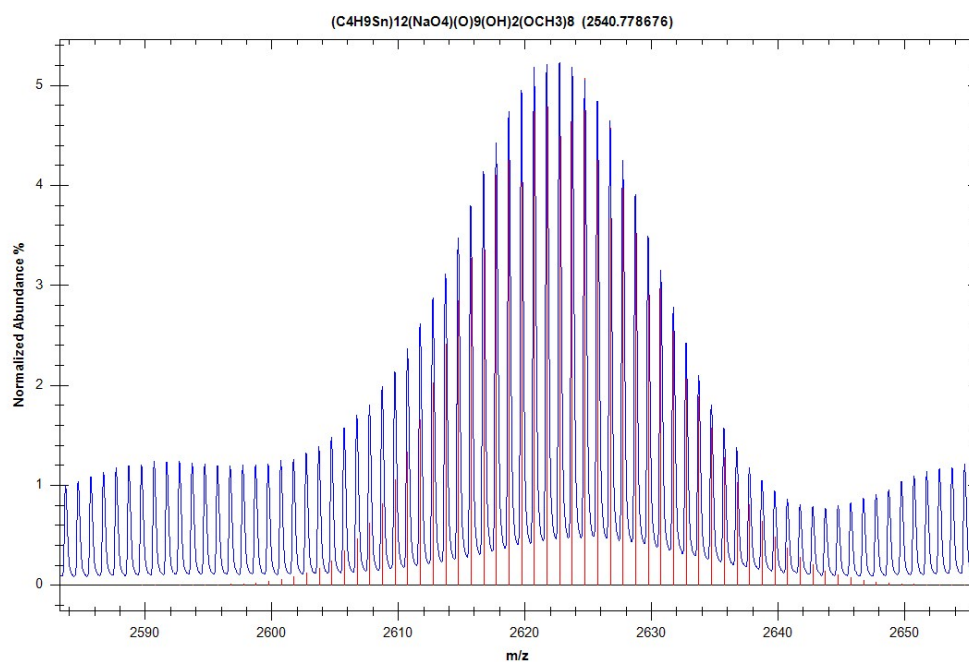

**Fig. S13:** Experimental ESI MS (+, blue spectrum) and calculated peak positions (red) for  $[(\text{BuSn})_{12}(\text{NaO}_4)(\text{O})_9(\text{OH})_2(\text{OCH}_3)_8]^{1+}$ .

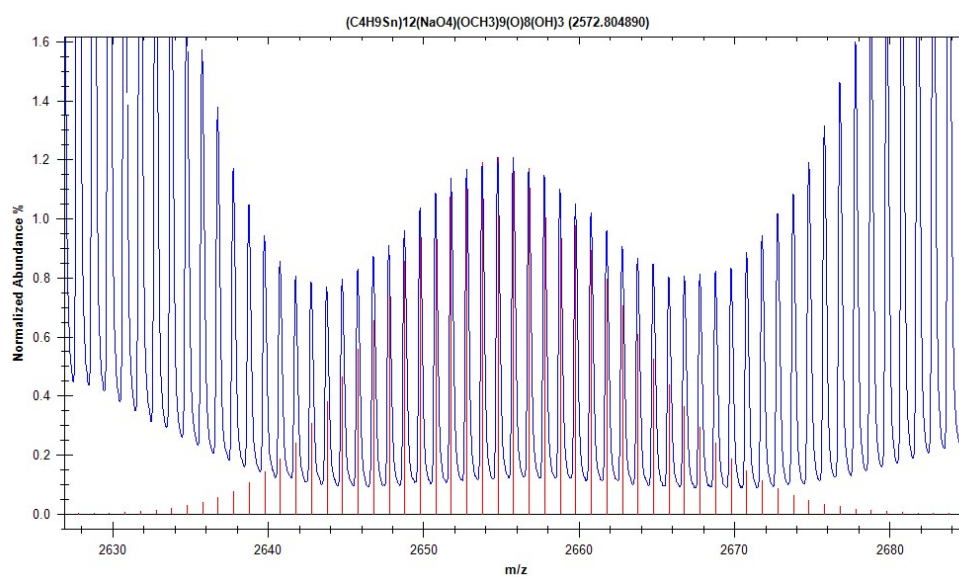

**Fig. S14:** Experimental ESI MS (+, blue spectrum) and calculated peak positions (red) for  $[(\text{BuSn})_{12}(\text{NaO}_4)(\text{O})_8(\text{OH})_3(\text{OCH}_3)_9]^{1+}$ .

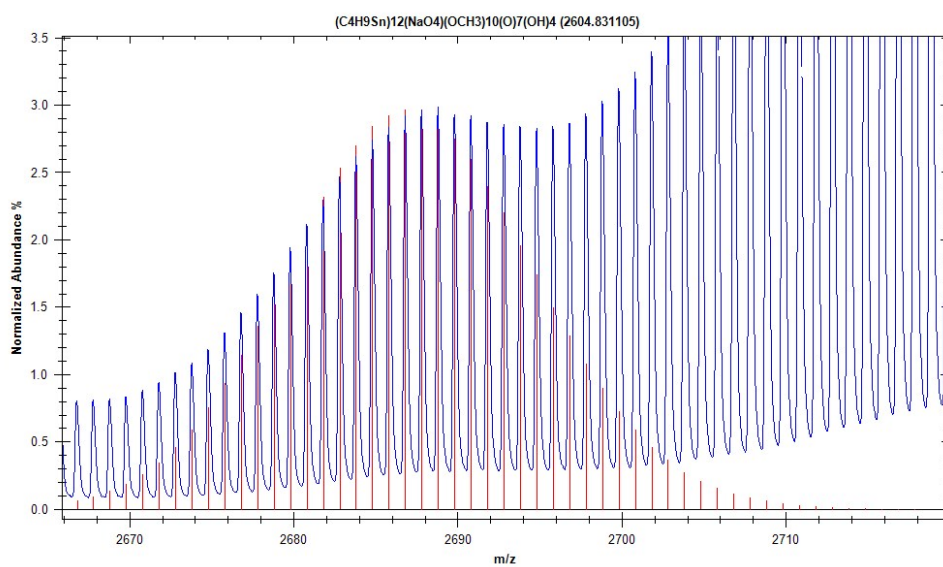

**Fig. S15:** Experimental ESI MS (+, blue spectrum) and calculated peak positions (red) for  $[(\text{BuSn})_{12}(\text{NaO}_4)(\text{O})_7(\text{OH})_4(\text{OCH}_3)_{10}]^{1+}$ .

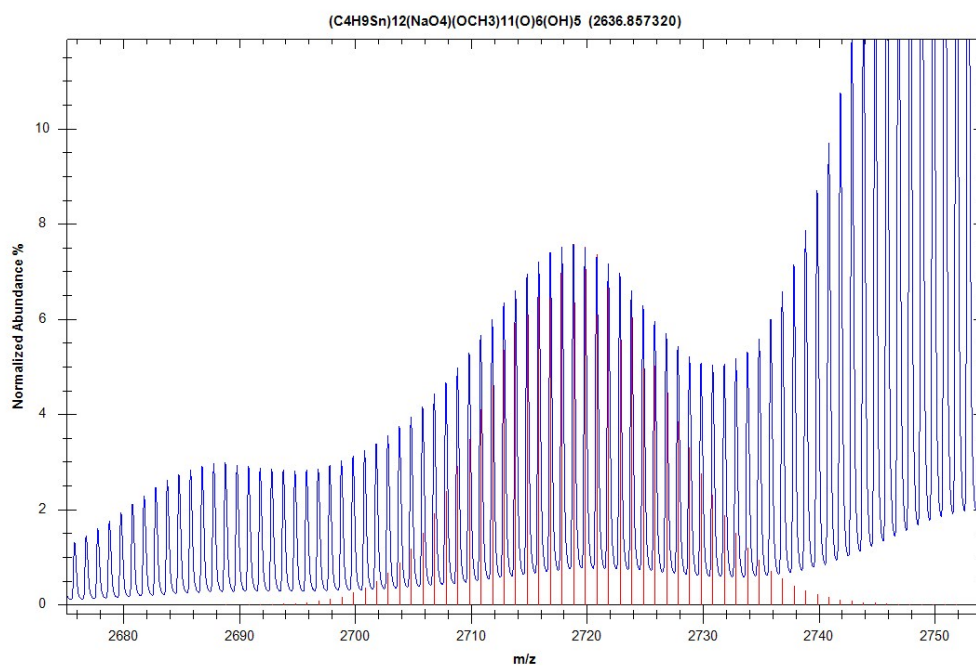

**Fig. S16:** Experimental ESI MS (+, blue spectrum) and calculated peak positions (red) for  $[(\text{BuSn})_{12}(\text{NaO}_4)(\text{O})_6(\text{OH})_5(\text{OCH}_3)_{11}]^{1+}$ .

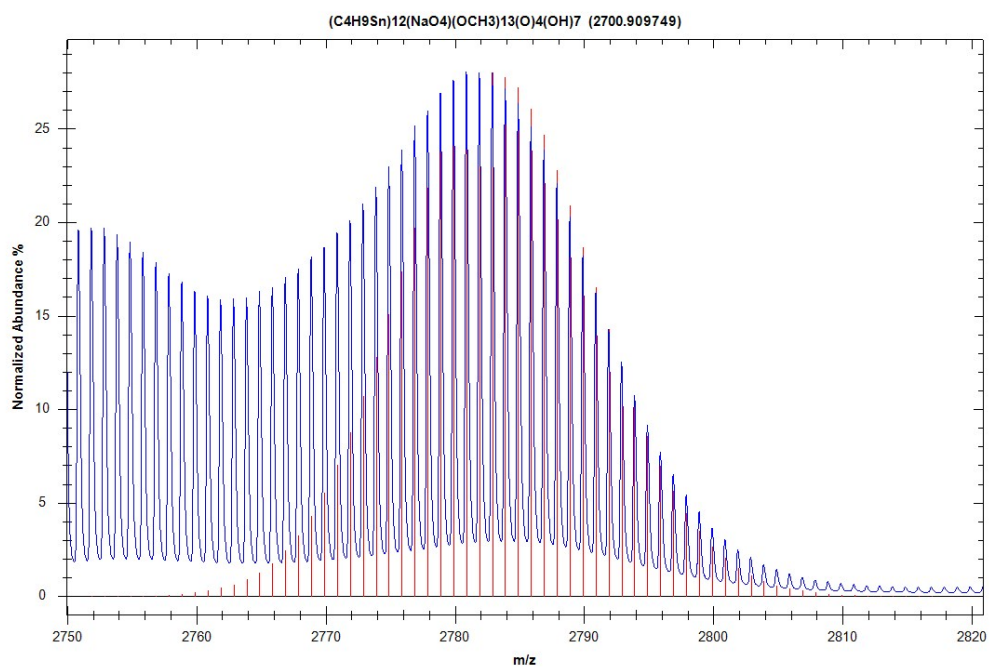

**Fig. S17:** Experimental ESI MS (+, blue spectrum) and calculated peak positions (red) for  $[(BuSn)_{12}(NaO_4)(O)_4(OH)_7(OCH_3)_{13}]^{1+}$ .

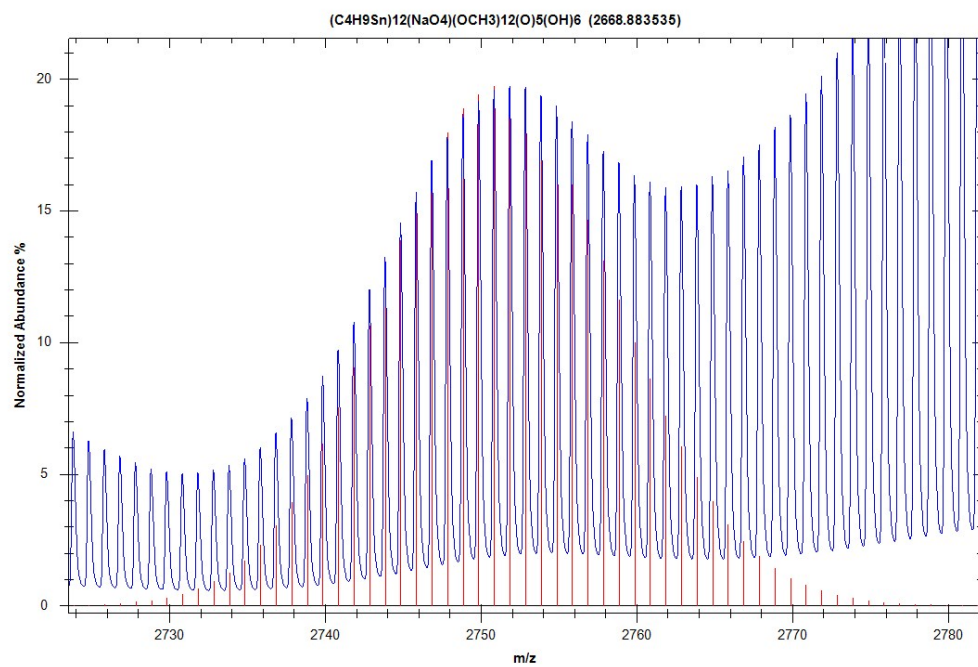

**Fig. S18:** Experimental ESI MS (+, blue spectrum) and calculated peak positions (red) for  $[(BuSn)_{12}(NaO_4)(O)_5(OH)_6(OCH_3)_{12}]^{1+}$ .



**Figure SI10:** Size distribution analysis of SAXS data of  $\beta,\gamma$ -NaSn<sub>12</sub> in benzene.

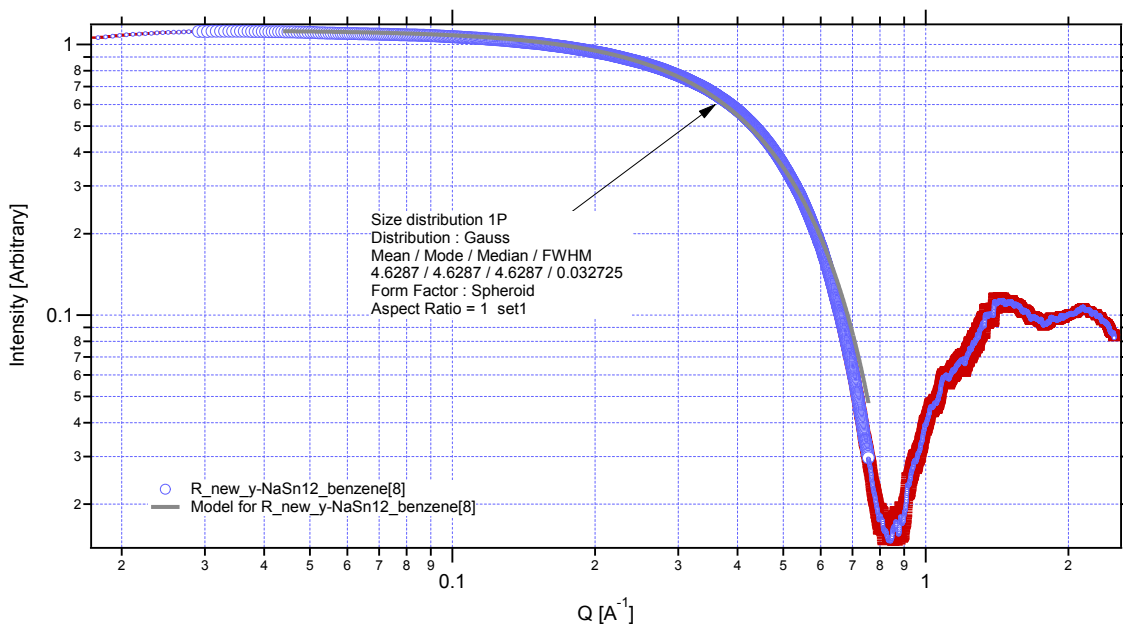

**Figure SI11:** Modelling II results for  $\beta,\gamma$ -NaSn<sub>12</sub> in benzene. The experimental scattering curve is in red and the calculated model in gray. The calculated radius is consistent with the radius determined from the experimental crystal structure.

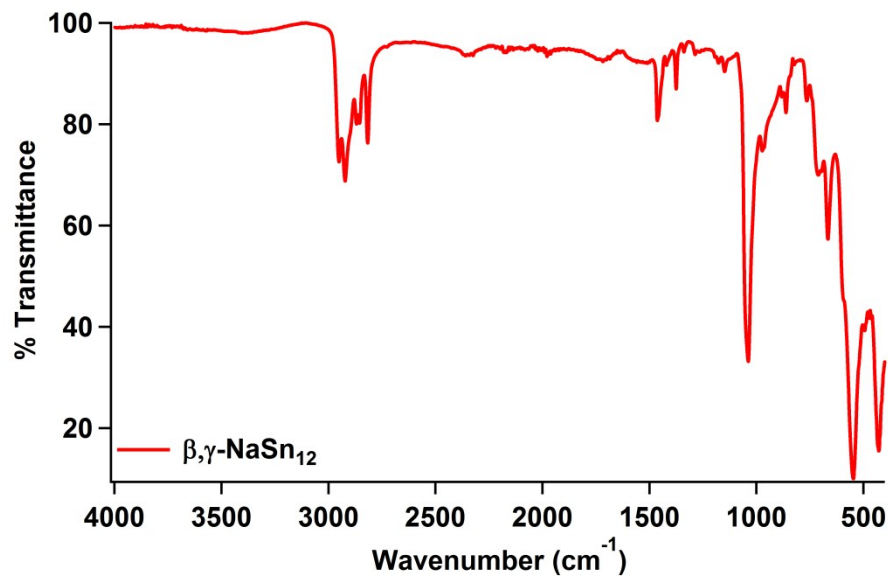

**Figure SI12:** IR spectrum of  $\beta,\gamma$ -NaSn<sub>12</sub> showing the presence of methoxy ligands indicated by the strong C-O stretch at 1038 cm<sup>-1</sup>.

## REFERENCES

1 M. J. Frisch, G. W. Trucks, H. B. Schlegel, G. E. Scuseria, M. A. Robb, J. R. Cheeseman, G. Scalmani, V. Barone, G. A. Petersson, H. Nakatsuji, X. Li, M. Caricato, A. V. Marenich, J. Bloino, B. G. Janesko, R. Gomperts, B. Mennucci, H. P. Hratchian, J. V. Ortiz, A. F. Izmaylov, J. L. Sonnenberg, Williams, F. Ding, F. Lipparini, F. Egidi, J. Goings, B. Peng, A. Petrone, T. Henderson, D. Ranasinghe, V. G. Zakrzewski, J. Gao, N. Rega, G. Zheng, W. Liang, M. Hada, M. Ehara, K. Toyota, R. Fukuda, J. Hasegawa, M. Ishida, T. Nakajima, Y. Honda, O. Kitao, H. Nakai, T. Vreven, K. Throssell, J. A. Montgomery Jr., J. E. Peralta, F. Ogliaro, M. J. Bearpark, J. J. Heyd, E. N. Brothers, K. N. Kudin, V. N. Staroverov, T. A. Keith, R. Kobayashi, J. Normand, K. Raghavachari, A. P. Rendell, J. C. Burant, S. S. Iyengar, J. Tomasi, M. Cossi, J. M. Millam, M. Klene, C. Adamo, R. Cammi, J. W. Ochterski, R. L. Martin, K. Morokuma, O. Farkas, J. B. Foresman and D. J. Fox, *Gaussian 09*, Gaussian, Inc., Wallingford, CT, 2013.
